# Supplementary material for: Phosphatidylserine on viable sperm and phagocytic machinery in oocytes regulate mammalian fertilization
Source: PubMed Central journal article supplement (PMC6773685; doi:10.1038/s41467-019-12406-z), 2019-10-01
Supplement: 41467_2019_12406_MOESM2_ESM.pdf [file 41467_2019_12406_MOESM2_ESM.pdf]

## Description of Additional Supplementary Files

**File name:** Supplementary Movie 1

**Description:** Sperm were isolated from the cauda epididymis, capacitated for 90 minutes in TYH+BSA, and stained with Annexin V conjugated with Alexa Fluor 488 (green). An aliquot of the sperm was placed on 20

µm chamber slides and  
Movies were recorded and analyzed. Asterisk points to one Annexin V+ spermatozoa (head staining) showing progressive motility.
